# Supplementary material for: Staphylococcus aureus viewed from the perspective of 40,000+ genomes
Source: PubMed Central journal article supplement (PMC6046195; doi:10.7717/peerj.5261), 2018-07-12

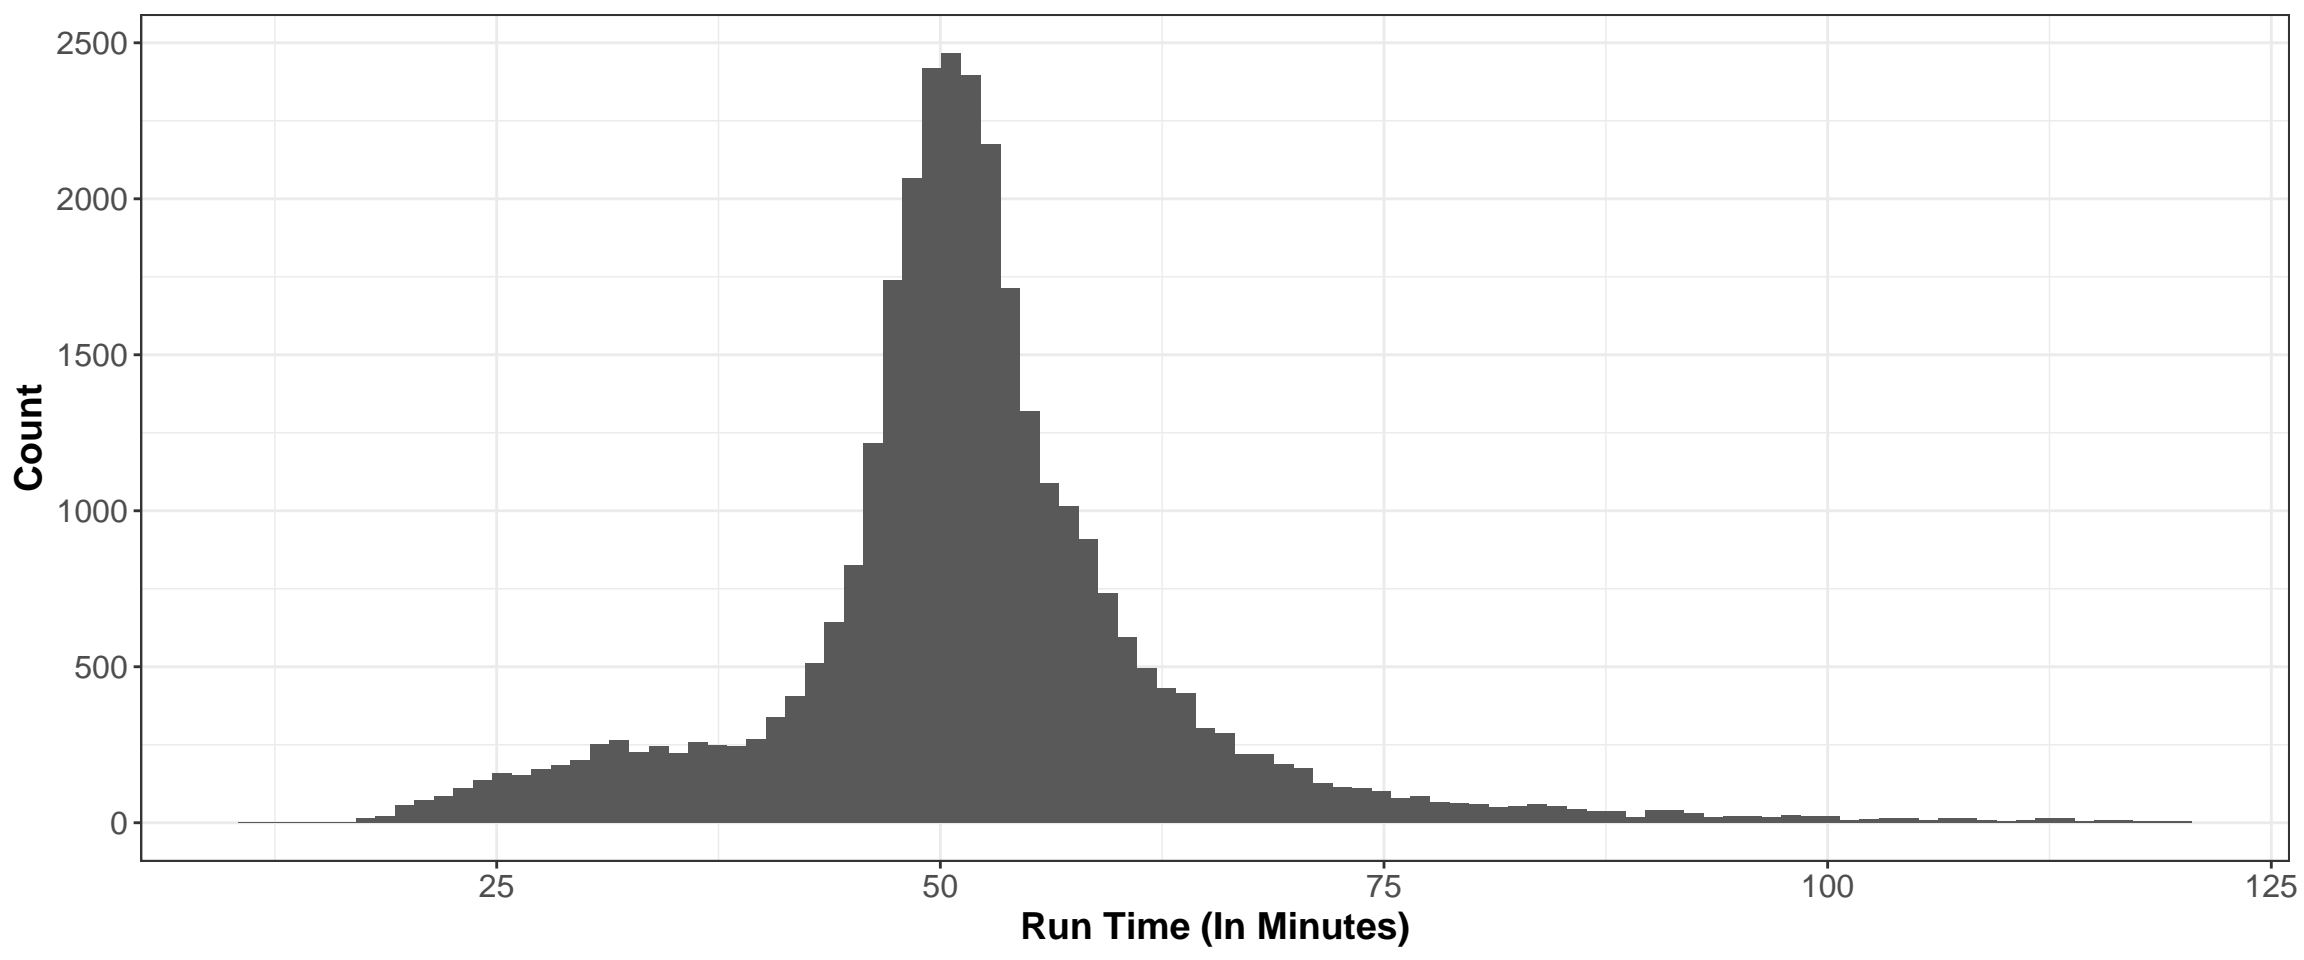

Supplement: peerj-06-5261-s002.pdf [file peerj-06-5261-s002.pdf]
