# Supplementary material for: Staphylococcus aureus viewed from the perspective of 40,000+ genomes
Source: PeerJ journal article supplement (doi:10.7717/peerj.5261), 2018-07-12

Tree scale: 0.001

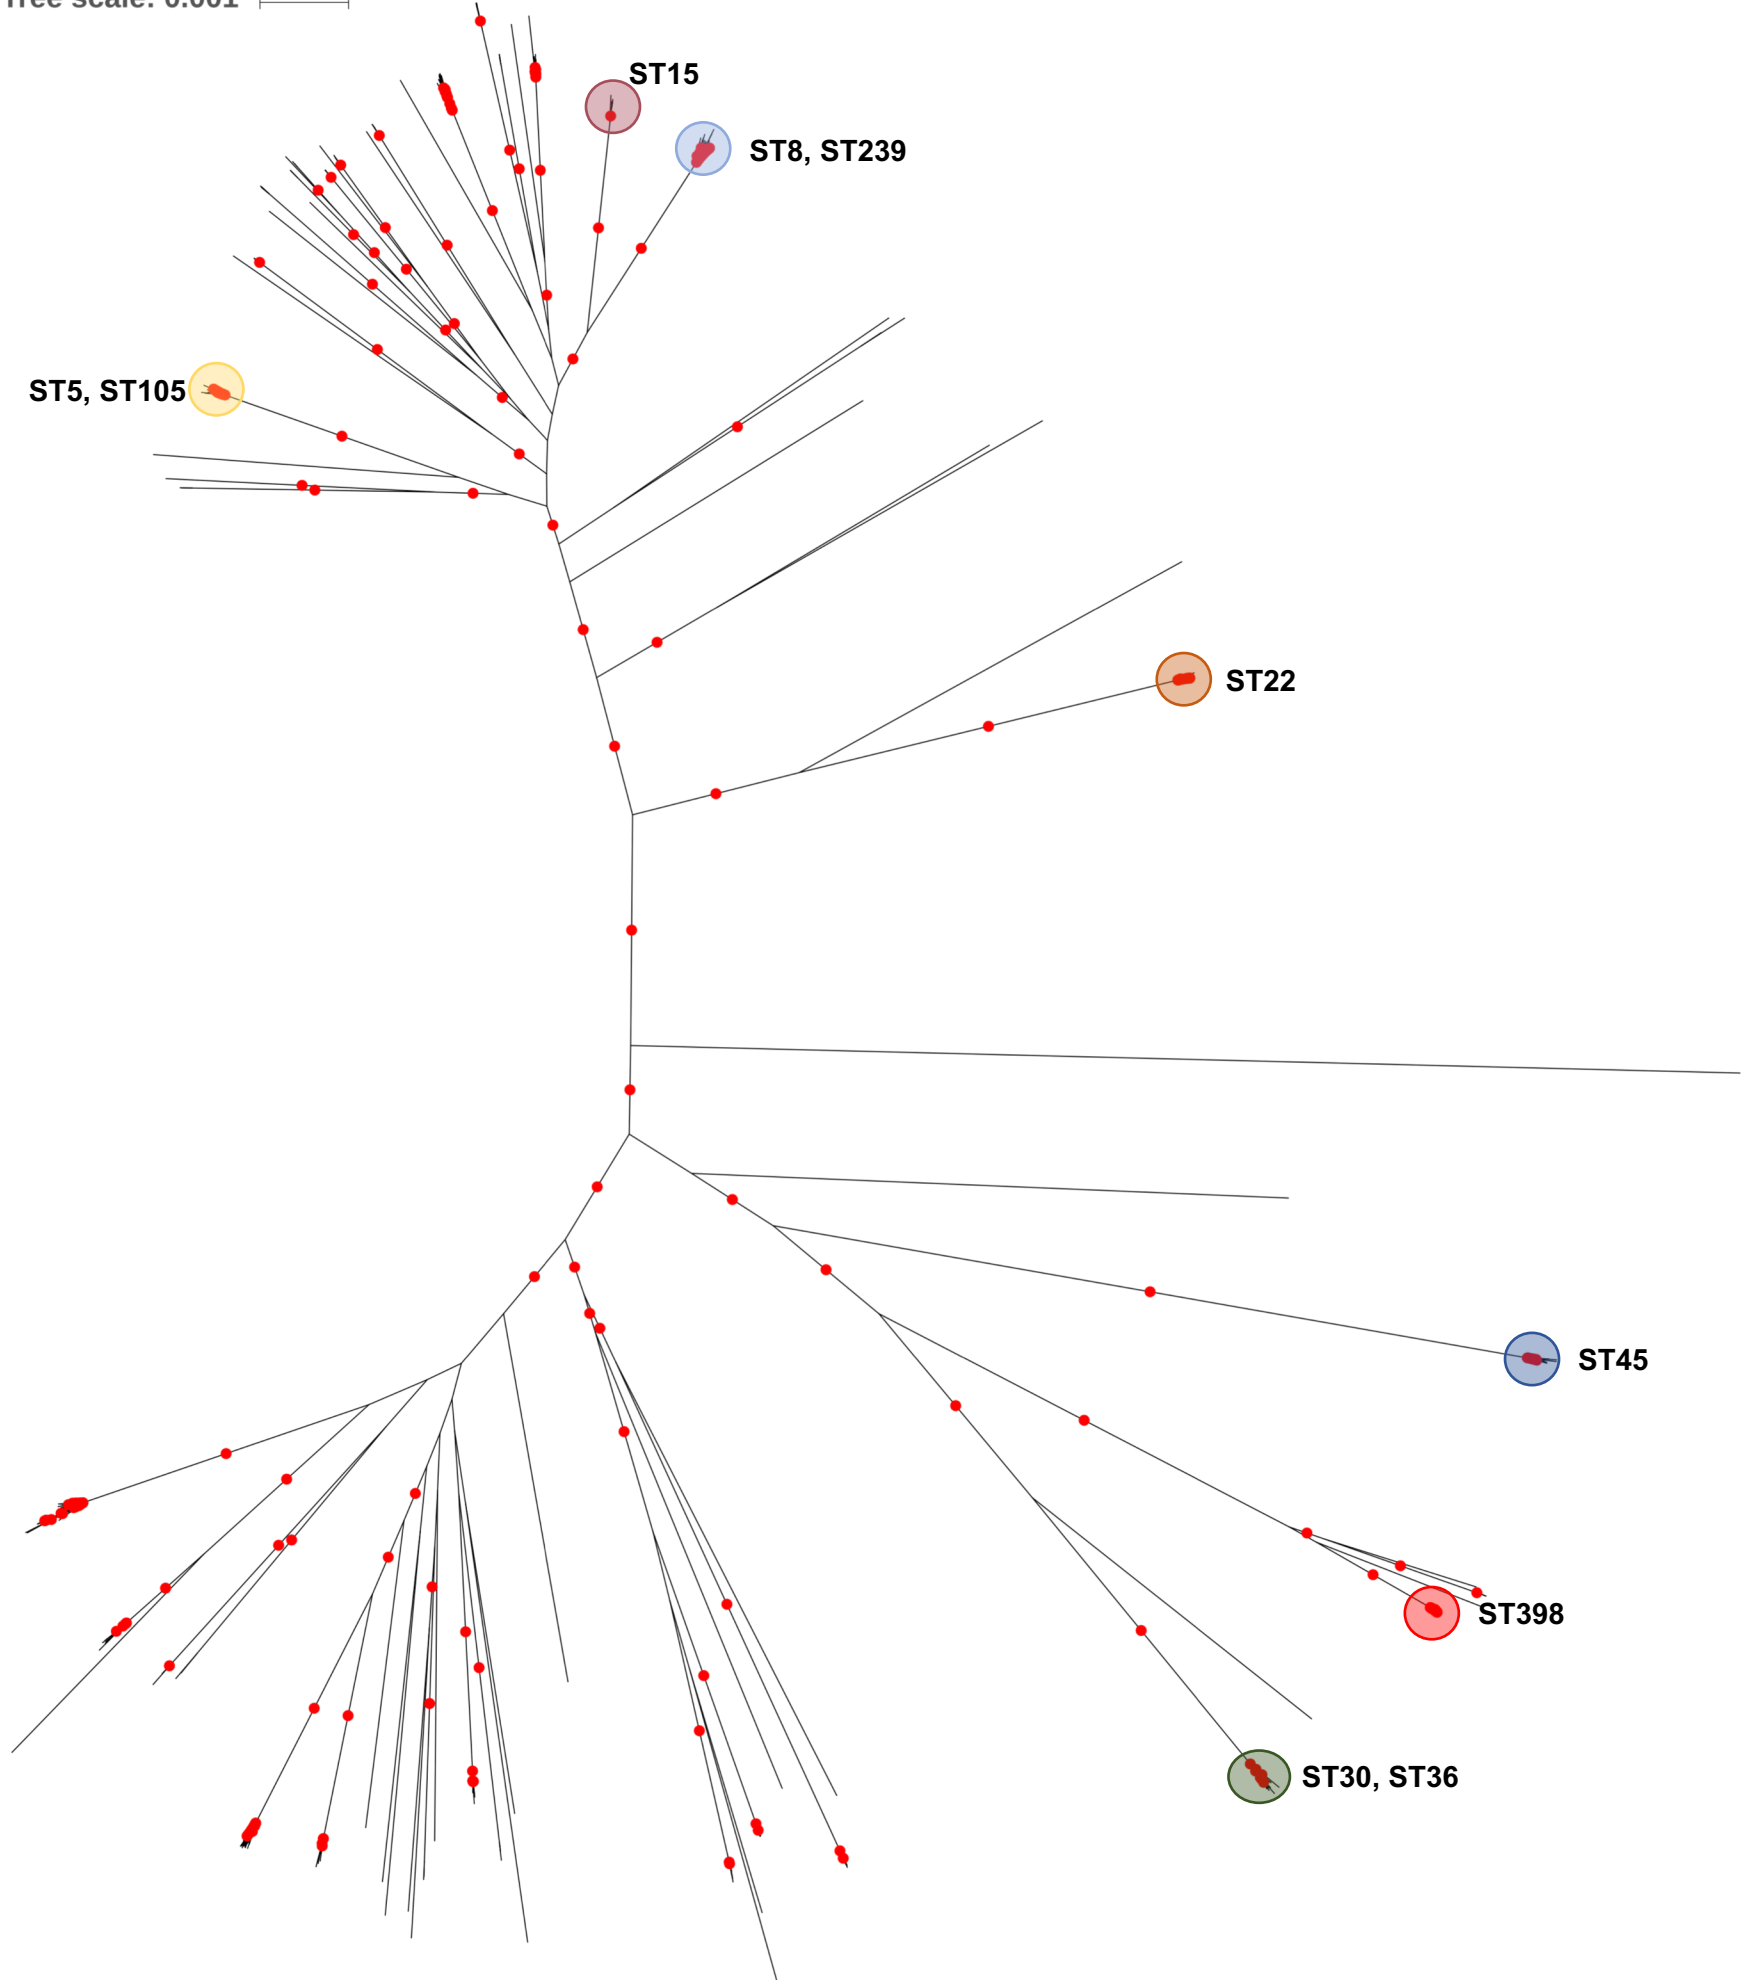

Supplement: supplementary-figure-03-annotated-phylogeny.pdf [file supplementary-figure-03-annotated-phylogeny.pdf]
